# Supplementary material for: Long-term recovery behavior of brain tissue in hydrocephalus patients after shunting
Source: PubMed Central journal article supplement (PMC9640582; doi:10.1038/s42003-022-04128-8), 2022-11-08
Supplement: 42003_2022_4128_MOESM1_ESM.pdf [file 42003_2022_4128_MOESM1_ESM.pdf]

## **Long-term recovery behavior of brain tissue in hydrocephalus patients after shunting**

Seifollah Gholampour<sup>1</sup>, David Frim<sup>1</sup>, Bakhtiar Yamini<sup>1\*</sup>

<sup>1</sup> Department of Neurological Surgery, University of Chicago, Chicago, Illinois, USA.

**\*Correspondence:** Bakhtiar Yamini, MD,  
Department of Neurological Surgery  
The University of Chicago  
5841 S. Maryland Ave, 60637, Chicago, IL, USA.  
**Tel:** (+1) 773-702-2123  
**Fax:** (+1) 773-702-3518  
**E-mail:** byamini@bsd.uchicago.edu

**Short Title:** Hydrocephalic brain recovery after shunting

**Number of supplementary Tables:** 7

**Number of supplementary Figures:** 6

**Supplementary Table 1.** Validation of the calculated CSF velocity in the cerebral aqueduct and calculated ICP.

CSF: Cerebrospinal fluid; ICP: Intracranial pressure; FSI: Fluid-structure interaction; Cine-PC MRI: Cine phase-contrast magnetic resonance imaging; SD: standard deviation; CV: coefficient of variation; CI: confidence of interval.

| Comparison of maximum CSF velocity (cm/s)              |           |           |           |           |           |           |           |           |           |            |            |            |            |            |            |            |       |      |       |        |       |
|--------------------------------------------------------|-----------|-----------|-----------|-----------|-----------|-----------|-----------|-----------|-----------|------------|------------|------------|------------|------------|------------|------------|-------|------|-------|--------|-------|
|                                                        | Healthy 1 | Healthy 2 | Healthy 3 | Healthy 4 | Healthy 5 | Healthy 6 | Healthy 7 | Healthy 8 | Healthy 9 | Healthy 10 | Healthy 11 | Healthy 12 | Healthy 13 | Healthy 14 | Healthy 15 | Healthy 16 | Mean  | SD   | CV    | 95% CI |       |
|                                                        | Lower     | Upper     |           |           |           |           |           |           |           |            |            |            |            |            |            |            |       |      |       |        |       |
| FSI simulation                                         | 1.52      | 2.76      | 2.12      | 1.85      | 2.89      | 3.14      | 1.78      | 2.14      | 2.05      | 2.56       | 1.84       | 3.04       | 2.74       | 1.74       | 2.07       | 2.54       | 2.30  | 0.49 | 21.51 | 2.30   | 2.30  |
| Cine-PC MRI                                            | 1.57      | 2.84      | 2.06      | 1.79      | 2.91      | 3.12      | 1.83      | 2.20      | 2.05      | 2.48       | 1.91       | 2.95       | 2.75       | 1.74       | 2.01       | 2.62       | 2.30  | 0.49 | 21.14 | 2.30   | 2.30  |
| Comparison of maximum pre-shunting CSF velocity (cm/s) |           |           |           |           |           |           |           |           |           |            |            |            |            |            |            |            |       |      |       |        |       |
|                                                        | Patient 1 | Patient 2 | Patient 3 | Patient 4 | Patient 5 | Patient 6 | Patient 7 | Patient 8 | Patient 9 | Patient 10 | Patient 11 | Patient 12 | Patient 13 | Patient 14 | ---        | ---        | Mean  | SD   | CV    | 95% CI |       |
|                                                        | Lower     | Upper     |           |           |           |           |           |           |           |            |            |            |            |            |            |            |       |      |       |        |       |
| FSI simulation                                         | 5.11      | 3.32      | 6.65      | 2.43      | 4.95      | 6.03      | 4.18      | 5.81      | 3.54      | 6.91       | 5.42       | 3.67       | 4.03       | 2.91       | ---        | ---        | 4.64  | 1.36 | 29.24 | 4.64   | 4.64  |
| Cine-PC MRI                                            | 4.95      | 3.42      | 6.62      | 2.5       | 4.89      | 6.14      | 4.3       | 5.98      | 3.43      | 6.84       | 5.37       | 3.56       | 4.07       | 2.86       | ---        | ---        | 4.64  | 1.36 | 29.27 | 4.64   | 4.64  |
| Comparison of maximum pre-shunting ICP (cm H2O)        |           |           |           |           |           |           |           |           |           |            |            |            |            |            |            |            |       |      |       |        |       |
|                                                        | Patient 1 | Patient 2 | Patient 3 | Patient 4 | Patient 5 | Patient 6 | Patient 7 | Patient 8 | Patient 9 | Patient 10 | Patient 11 | Patient 12 | Patient 13 | Patient 14 | ---        | ---        | Mean  | SD   | CV    | 95% CI |       |
|                                                        | Lower     | Upper     |           |           |           |           |           |           |           |            |            |            |            |            |            |            |       |      |       |        |       |
| Experimental                                           | 24.3      | 25.4      | 32.8      | 32.1      | 27.1      | 31.0      | ---       | ---       | 28.7      | 27.9       | ---        | 32.4       | 24.8       | 31.2       | ---        | ---        | 28.88 | 3.04 | 10.54 | 28.88  | 28.88 |
| FSI simulation                                         | 25.12     | 26.35     | 31.47     | 32.76     | 28.14     | 29.67     | ---       | ---       | 27.64     | 29.14      | ---        | 33.18      | 25.84      | 29.81      | ---        | ---        | 29.01 | 2.58 | 8.91  | 29.01  | 29.01 |

**Supplementary Table 2.** CSF volumetric strain of patients from before shunting to 15 months after shunting. After the twelfth month, the differences between the CSF volumes were negligible, hence, the CSF strain values are not calculated after 12 months.

CSF: cerebrospinal fluid; SD: standard deviation; SE: standard error; CV: coefficient of variation; CI: confidence of interval.

| Patient No.<br>Months after shunting | 1         | 2         | 3         | 4         | 5         | 6         | 7         | 8         | 9         | 10        | 11        | 12        | 13        | 14        | Mean    | SD    | SE    | CV     | 95% CI |        |
|--------------------------------------|-----------|-----------|-----------|-----------|-----------|-----------|-----------|-----------|-----------|-----------|-----------|-----------|-----------|-----------|---------|-------|-------|--------|--------|--------|
|                                      |           |           |           |           |           |           |           |           |           |           |           |           |           |           |         |       |       |        | Lower  | Upper  |
| 1                                    | -0.648456 | -0.628781 | -0.639157 | -0.606223 | -0.671810 | -0.610882 | -0.690000 | -0.659925 | -0.663842 | -0.615605 | -0.682554 | -0.668414 | -0.627625 | -0.686898 | -0.6500 | 0.029 | 0.008 | -4.440 | -0.666 | -0.634 |
| 2                                    | -0.607853 | -0.662174 | -0.677920 | -0.635461 | -0.640997 | -0.655780 | -0.621107 | -0.669655 | -0.696147 | -0.637982 | -0.660293 | -0.699960 | -0.595515 | -0.702811 | -0.6545 | 0.034 | 0.009 | -5.119 | -0.673 | -0.636 |
| 3                                    | -0.644087 | -0.645112 | -0.683793 | -0.590665 | -0.702379 | -0.686678 | -0.658869 | -0.695369 | -0.642774 | -0.670305 | -0.691458 | -0.645407 | -0.651708 | -0.671657 | -0.6629 | 0.029 | 0.008 | -4.448 | -0.679 | -0.647 |
| 6                                    | -0.615563 | -0.698735 | -0.655132 | -0.649678 | -0.661050 | -0.631641 | -0.661404 | -0.662705 | -0.666417 | -0.637485 | -0.699027 | -0.675530 | -0.656628 | -0.687346 | -0.6613 | 0.024 | 0.006 | -3.624 | -0.675 | -0.648 |
| 9                                    | -0.636378 | -0.666561 | -0.676745 | -0.633852 | -0.692108 | -0.670505 | -0.645690 | -0.680775 | -0.680463 | -0.655387 | -0.687897 | -0.694979 | -0.633581 | -0.705052 | -0.6686 | 0.024 | 0.006 | -3.589 | -0.682 | -0.655 |
| 12                                   | -0.664131 | -0.701660 | -0.693424 | -0.655043 | -0.706781 | -0.689092 | -0.664191 | -0.700002 | -0.698254 | -0.673289 | -0.701253 | -0.713479 | -0.661548 | -0.708190 | -0.6879 | 0.020 | 0.005 | -2.905 | -0.699 | -0.677 |

**Supplementary Table 3.** Brain volumetric strain of patients from before shunting to 15 months after shunting.

SD: standard deviation; SE: standard error; CV: coefficient of variation; CI: confidence of interval.

| Patient No.<br>Months after shunting | 1        | 2        | 3        | 4        | 5        | 6        | 7        | 8        | 9        | 10       | 11       | 12       | 13       | 14       | Mean    | SD    | SE    | CV     | 95% CI |       |
|--------------------------------------|----------|----------|----------|----------|----------|----------|----------|----------|----------|----------|----------|----------|----------|----------|---------|-------|-------|--------|--------|-------|
|                                      |          |          |          |          |          |          |          |          |          |          |          |          |          |          |         |       |       |        | Lower  | Upper |
| 1                                    | 0.066983 | 0.036359 | 0.075588 | 0.055158 | 0.021061 | 0.057582 | 0.045796 | 0.038944 | 0.055344 | 0.040145 | 0.051315 | 0.106541 | 0.037413 | 0.046854 | 0.05251 | 0.021 | 0.006 | 39.513 | 0.041  | 0.064 |
| 2                                    | 0.085813 | 0.080590 | 0.091492 | 0.075649 | 0.038642 | 0.077084 | 0.063373 | 0.055821 | 0.073496 | 0.056906 | 0.068207 | 0.127255 | 0.053974 | 0.063346 | 0.07226 | 0.021 | 0.006 | 29.304 | 0.061  | 0.084 |
| 3                                    | 0.104553 | 0.110979 | 0.102864 | 0.093797 | 0.056495 | 0.093437 | 0.078612 | 0.072401 | 0.089498 | 0.069477 | 0.091673 | 0.146503 | 0.071946 | 0.081328 | 0.09025 | 0.022 | 0.006 | 24.627 | 0.078  | 0.103 |
| 6                                    | 0.124922 | 0.131851 | 0.116289 | 0.112629 | 0.072535 | 0.109791 | 0.093678 | 0.085429 | 0.104984 | 0.081512 | 0.105734 | 0.165849 | 0.087284 | 0.097920 | 0.10646 | 0.024 | 0.006 | 22.533 | 0.093  | 0.120 |
| 9                                    | 0.141941 | 0.154021 | 0.128174 | 0.132144 | 0.086038 | 0.125636 | 0.109783 | 0.102799 | 0.120383 | 0.094707 | 0.120709 | 0.184707 | 0.102339 | 0.117194 | 0.12290 | 0.026 | 0.007 | 20.767 | 0.109  | 0.137 |
| 12                                   | 0.154706 | 0.168620 | 0.135100 | 0.144145 | 0.100629 | 0.142193 | 0.125196 | 0.124808 | 0.139568 | 0.116015 | 0.134770 | 0.202490 | 0.120406 | 0.131997 | 0.13862 | 0.025 | 0.007 | 17.908 | 0.125  | 0.152 |
| 15                                   | 0.172812 | 0.190141 | 0.152458 | 0.167270 | 0.115038 | 0.157225 | 0.137145 | 0.141191 | 0.157291 | 0.129922 | 0.148192 | 0.213726 | 0.136873 | 0.147197 | 0.15475 | 0.025 | 0.007 | 16.366 | 0.141  | 0.169 |

**Supplementary Table 4.** CSF volumetric creep of patients from before shunting to 15 months after shunting. After the twelfth month, the differences between the CSF volumes were negligible, hence, the CSF creep values are not calculated after 12 months. Stages 1-2 means the CSF volumetric creep between the first and second months after shunting.

CSF: cerebrospinal fluid; SD: standard deviation; SE: standard error; CV: coefficient of variation; CI: confidence of interval.

| Patient No.<br>Stages | 1         | 2         | 3         | 4         | 5         | 6         | 7         | 8         | 9         | 10        | 11        | 12        | 13        | 14        | Mean     | SD    | SE    | CV       | 95% CI |        |
|-----------------------|-----------|-----------|-----------|-----------|-----------|-----------|-----------|-----------|-----------|-----------|-----------|-----------|-----------|-----------|----------|-------|-------|----------|--------|--------|
|                       |           |           |           |           |           |           |           |           |           |           |           |           |           |           |          |       |       |          | Lower  | Upper  |
| 1-2                   | 0.040602  | -0.033393 | -0.038762 | -0.029238 | 0.030814  | -0.044898 | 0.068893  | -0.009730 | -0.032305 | -0.022377 | 0.022261  | -0.031546 | 0.032110  | -0.015913 | -0.00453 | 0.036 | 0.010 | -796.543 | -0.025 | 0.015  |
| 2-3                   | -0.036234 | 0.017062  | -0.005873 | 0.044796  | -0.061383 | -0.030898 | -0.037763 | -0.025714 | 0.053373  | -0.032323 | -0.031166 | 0.054553  | -0.056193 | 0.031153  | -0.00833 | 0.041 | 0.011 | -487.717 | -0.031 | 0.014  |
| 3-6                   | 0.009508  | -0.017874 | 0.009554  | -0.019671 | 0.013776  | 0.018346  | -0.000845 | 0.010888  | -0.007881 | 0.010940  | -0.002523 | -0.010041 | -0.001640 | -0.005230 | 0.00052  | 0.012 | 0.003 | 2284.957 | -0.006 | 0.007  |
| 6-9                   | -0.006938 | 0.010725  | -0.007204 | 0.005275  | -0.010353 | -0.012955 | 0.005238  | -0.006023 | -0.004682 | -0.005967 | 0.003710  | -0.006483 | 0.007682  | -0.005902 | -0.00242 | 0.007 | 0.002 | -304.720 | -0.007 | 0.002  |
| 9-12                  | -0.009251 | -0.011700 | -0.005560 | -0.007064 | -0.004891 | -0.006196 | -0.006167 | -0.006409 | -0.005930 | -0.005967 | -0.004452 | -0.006167 | -0.009322 | -0.001046 | -0.00644 | 0.002 | 0.001 | -38.819  | -0.008 | -0.005 |

**Supplementary Table 5.** Brain volumetric creep of patients from before shunting to 15 months after shunting. The unit of all values is  $s^{-1}$ . Stages 1-2 means the CSF volumetric creep between the first and second months after shunting.

SD: standard deviation; SE: standard error; CV: coefficient of variation; CI: confidence of interval.

| Patient No.<br>Stages | 1        | 2        | 3        | 4        | 5        | 6        | 7        | 8        | 9        | 10       | 11       | 12       | 13       | 14       | Mean    | SD    | SE    | CV     | 95% CI |       |
|-----------------------|----------|----------|----------|----------|----------|----------|----------|----------|----------|----------|----------|----------|----------|----------|---------|-------|-------|--------|--------|-------|
|                       |          |          |          |          |          |          |          |          |          |          |          |          |          |          |         |       |       |        | Lower  | Upper |
| 1-2                   | 0.018830 | 0.044232 | 0.015904 | 0.020490 | 0.017581 | 0.019502 | 0.017577 | 0.016877 | 0.018153 | 0.016761 | 0.016892 | 0.020714 | 0.016561 | 0.016492 | 0.01975 | 0.007 | 0.002 | 36.467 | 0.016  | 0.024 |
| 2-3                   | 0.018740 | 0.030389 | 0.011372 | 0.018149 | 0.017853 | 0.016353 | 0.015239 | 0.016580 | 0.016002 | 0.012571 | 0.023466 | 0.019248 | 0.017972 | 0.017982 | 0.01799 | 0.005 | 0.001 | 25.572 | 0.015  | 0.021 |
| 3-6                   | 0.006790 | 0.006957 | 0.004475 | 0.006277 | 0.005347 | 0.005451 | 0.005022 | 0.004343 | 0.005162 | 0.004012 | 0.004687 | 0.006449 | 0.005113 | 0.005530 | 0.00540 | 0.001 | 0.000 | 16.985 | 0.005  | 0.006 |
| 6-9                   | 0.005673 | 0.007390 | 0.003962 | 0.006505 | 0.004501 | 0.005282 | 0.005368 | 0.005790 | 0.005133 | 0.004398 | 0.004991 | 0.006286 | 0.005018 | 0.006425 | 0.00548 | 0.001 | 0.000 | 17.111 | 0.005  | 0.006 |
| 9-12                  | 0.004255 | 0.004867 | 0.002309 | 0.004001 | 0.004863 | 0.005519 | 0.005137 | 0.007336 | 0.006395 | 0.007103 | 0.004687 | 0.005928 | 0.006022 | 0.004934 | 0.00524 | 0.001 | 0.000 | 24.912 | 0.005  | 0.006 |
| 12-15                 | 0.006035 | 0.007174 | 0.005786 | 0.007708 | 0.004803 | 0.005011 | 0.003983 | 0.005461 | 0.005907 | 0.004636 | 0.004474 | 0.003745 | 0.005489 | 0.005067 | 0.00538 | 0.001 | 0.000 | 20.692 | 0.005  | 0.006 |

**Supplementary Table 6.** Brain stiffness for patients from before shunting to 15 months after shunting. The unit of all values is N/ml. The force changes after the ninth month was negligible. Hence, the stiffness values measure to the ninth month. Stages 0-1 means the brain stiffness between before shunting and the first month after shunting.

SD: standard deviation; SE: standard error; CV: coefficient of variation; CI: confidence of interval.

| Stages \ Patient No. | 1           | 2           | 3           | 4           | 5           | 6           | 7           | 8           | 9           | 10          | 11          | 12          | 13          | 14          | Mean         | SD       | SE       | CV          | 95% CI      |             |
|----------------------|-------------|-------------|-------------|-------------|-------------|-------------|-------------|-------------|-------------|-------------|-------------|-------------|-------------|-------------|--------------|----------|----------|-------------|-------------|-------------|
|                      |             |             |             |             |             |             |             |             |             |             |             |             |             |             |              |          |          |             | Lower       | Upper       |
| 0-1                  | -1.32191841 | -2.89002802 | -1.47606503 | -2.70746189 | -5.61115718 | -2.10617742 | -3.02791565 | -3.28528486 | -1.57109188 | -2.90273994 | -2.38024107 | -1.31972746 | -2.39508042 | -2.66182664 | -2.546908277 | 1.102448 | 0.294642 | -43.2857348 | -3.15742361 | -1.93639295 |
| 1-2                  | 0.12756514  | -0.10435539 | -0.88619043 | 0.09266298  | -0.05284303 | 0.06923522  | 0.14957508  | -0.3126644  | -1.11127962 | 0.37899108  | 0.70287916  | 0.19391175  | -0.24318072 | 0.08142052  | -0.065305191 | 0.469458 | 0.125468 | -718.867417 | -0.32528222 | 0.19467184  |
| 2-3                  | 0.11720025  | -0.33488876 | 0.0279316   | 0.16890323  | 0.18593188  | 0.20528351  | 0.14167265  | 0.26417127  | 0.15403746  | 0.14070236  | 0.12861905  | 0.1246802   | 0.25116061  | 0.14607164  | 0.122962641  | 0.144147 | 0.038525 | 117.2282295 | 0.04313673  | 0.20278855  |
| 3-6                  | 0.01227728  | -0.07463814 | 0.08581631  | -0.01546649 | -0.04175251 | -0.10993108 | -0.04783129 | 0.02843304  | -0.14682724 | -0.14673787 | -0.13237202 | -0.02741414 | -0.10527766 | -0.16811088 | -0.063559477 | 0.075652 | 0.020219 | -119.024861 | -0.10545393 | -0.02166503 |
| 6-9                  | -0.01492519 | -0.03095893 | -0.04800093 | -0.01755032 | -0.06819398 | -0.04463854 | -0.02103607 | -0.03351833 | -0.03467688 | -0.06422188 | -0.02050826 | -0.04176701 | -0.04387702 | -0.02446492 | -0.036309876 | 0.016549 | 0.004423 | -45.5775439 | -0.04547449 | -0.02714526 |

**Supplementary Table 7.** Intracranial elastance (IE) on the brain tissue of patients from before shunting to 15 months after shunting. The unit of all values is cm H<sub>2</sub>O/ml. The ICP changes after the sixth month was negligible. Hence, the elastance values measure to the sixth month. Stages 0-1 means the intracranial elastance between before shunting and the first month after shunting.

SD: standard deviation; SE: standard error; CV: coefficient of variation; CI: confidence of interval.

| Patient No.<br>Stages | 1        | 2        | 3        | 4        | 5        | 6        | 7       | 8        | 9        | 10       | 11      | 12       | 13      | 14       | Mean     | SD      | SE      | CV        | 95% CI   |         |
|-----------------------|----------|----------|----------|----------|----------|----------|---------|----------|----------|----------|---------|----------|---------|----------|----------|---------|---------|-----------|----------|---------|
|                       |          |          |          |          |          |          |         |          |          |          |         |          |         |          |          |         |         |           | Lower    | Upper   |
| 0-1                   | 0.05722  | 0.06450  | 0.06723  | 0.10465  | 0.06742  | 0.07662  | 0.08073 | 0.07112  | 0.05014  | 0.07468  | 0.06353 | 0.08122  | 0.05908 | 0.06460  | 0.07020  | 0.01330 | 0.00356 | 18.94892  | 0.06283  | 0.07756 |
| 1-2                   | 0.14494  | -0.10949 | 0.01152  | -0.22202 | 0.15317  | -0.13011 | 0.08424 | -0.34286 | 0.07899  | -0.32444 | 0.37400 | -0.19398 | 0.12177 | -0.34225 | -0.04975 | 0.22080 | 0.05901 | -443.8009 | -0.17203 | 0.07252 |
| 2-3                   | 0.02979  | -0.33286 | 0.22800  | -0.01856 | 0.00956  | 0.02266  | 0.02483 | 0.01171  | -0.01404 | 0.03231  | 0.02857 | -0.01826 | 0.00507 | -0.02878 | -0.00143 | 0.11388 | 0.03043 | -7973.177 | -0.06449 | 0.06163 |
| 3-6                   | -0.02973 | 0.02455  | -0.00984 | 0.01727  | -0.02426 | -0.02588 | 0.41000 | -0.01773 | 0.06139  | -0.04091 | 0.17059 | 0.03307  | 0.29474 | 0.10429  | 0.06911  | 0.13533 | 0.03617 | 195.81079 | -0.00583 | 0.14405 |



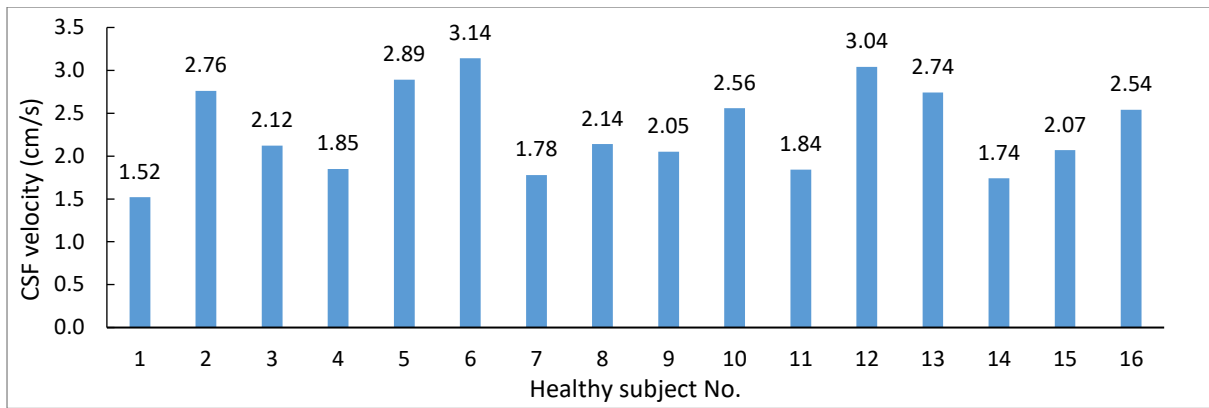

**Supplementary Figure 1.** CSF velocity in the cerebral aqueduct of healthy subjects. The mean, standard deviation, standard error, and coefficient of variation are 2.30 cm/s, 0.51, 0.13, and 22.21%, respectively. The upper and lower confidence interval are 2.55 and 2.04, respectively.

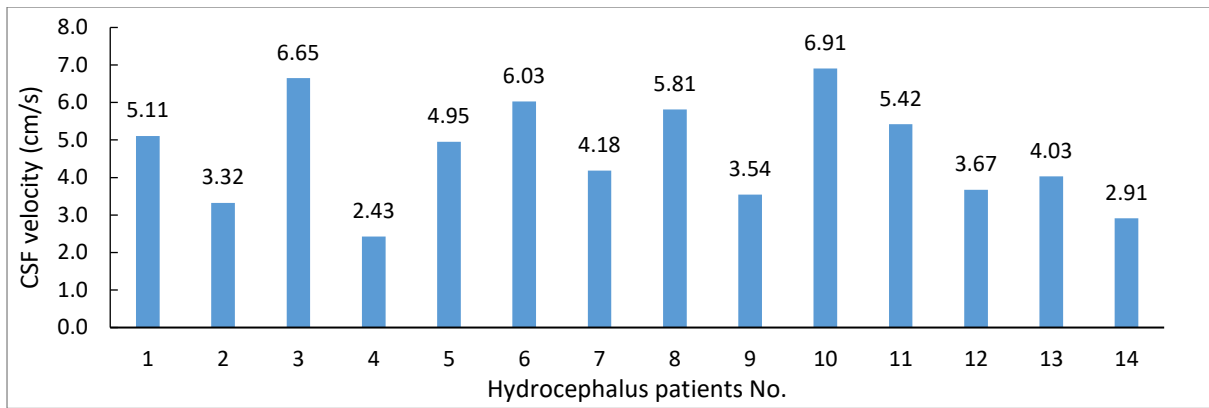

**Supplementary Figure 2.** CSF velocity in the cerebral aqueduct of hydrocephalus patients. The mean, standard deviation, standard error, and coefficient of variation are 4.64 cm/s, 1.41, 0.38, and 30.34%, respectively. The upper and lower confidence interval are 5.34 and 3.94, respectively.

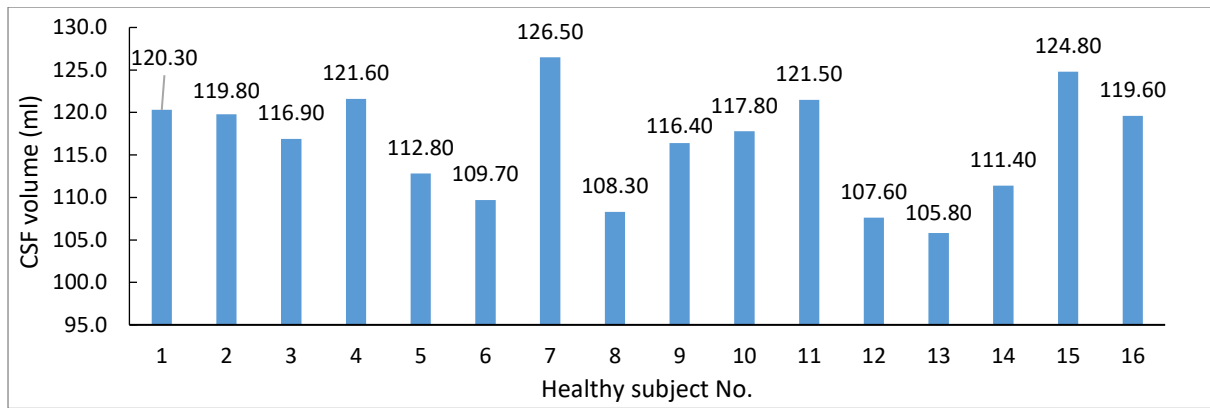

**Supplementary Figure 3.** CSF volume of healthy subjects. The mean, standard deviation, standard error, and coefficient of variation are 116.30 ml, 6.34, 1.59, and 5.45%, respectively. The upper and lower confidence interval are 119.45 and 113.15, respectively.

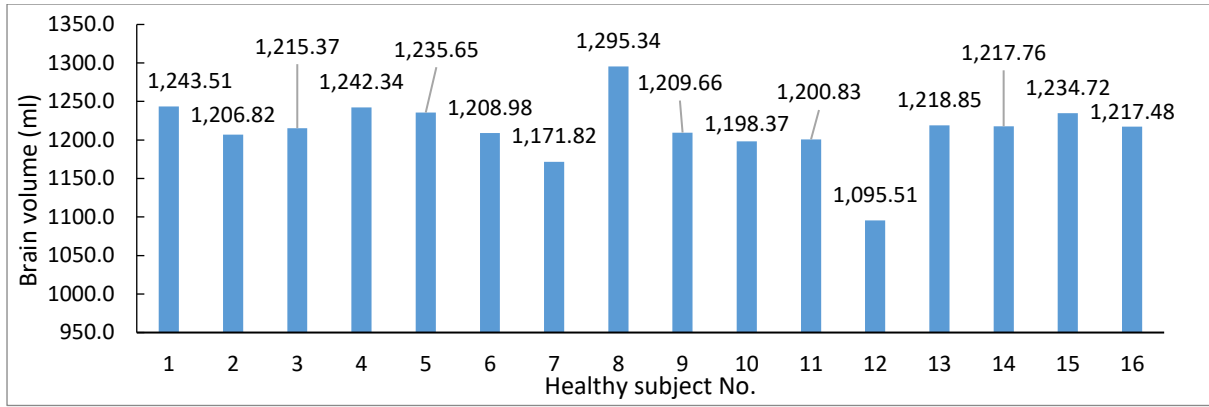

**Supplementary Figure 4.** The brain volume of healthy subjects. The mean, standard deviation, standard error, and coefficient of variation are 1,213.31 ml, 41.28, 10.32, and 3.40%, respectively. The upper and lower confidence interval are 1,233.84 and 1,192.78, respectively.

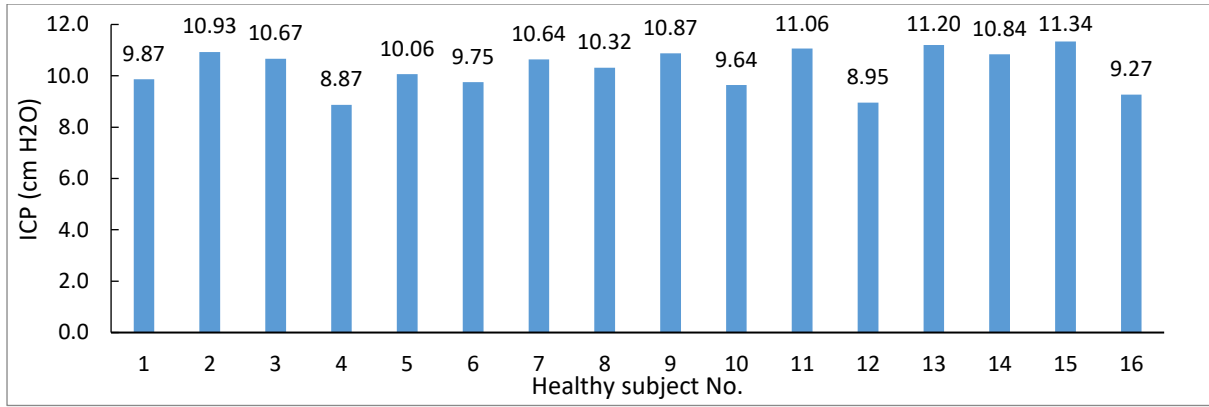

**Supplementary Figure 5.** ICP of healthy subjects. The mean, standard deviation, standard error, and coefficient of variation are 10.27 cm H<sub>2</sub>O, 0.80, 0.20, and 7.80%, respectively. The upper and lower confidence interval are 10.67 and 9.87, respectively.

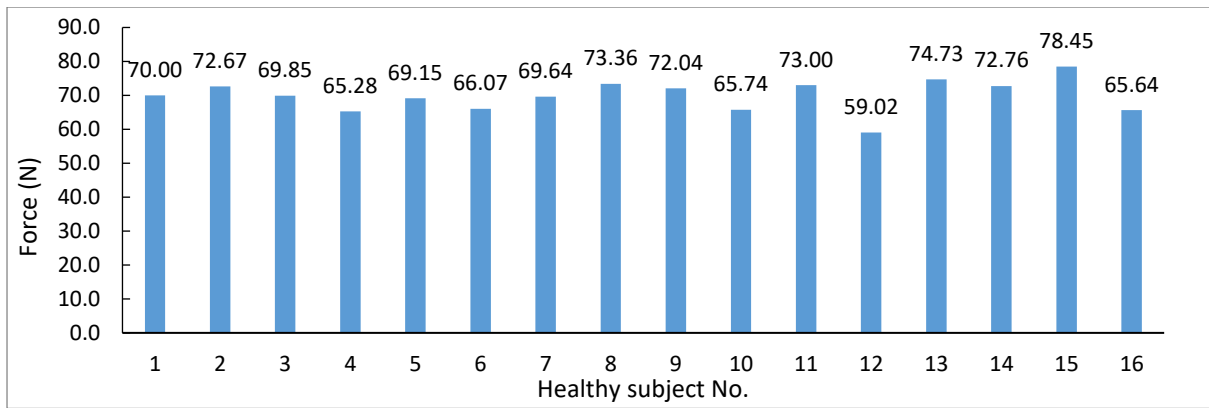

**Supplementary Figure 6.** Exerted force on the brain tissue of healthy subjects. The mean, standard deviation, standard error, and coefficient of variation are 69.84 N, 4.68, 1.17, and 6.70%, respectively. The upper and lower confidence interval are 72.17 and 67.51, respectively.
