# Supplementary material for: Long-term recovery behavior of brain tissue in hydrocephalus patients after shunting
Source: PubMed Central journal article supplement (PMC9640582; doi:10.1038/s42003-022-04128-8), 2022-11-08
Supplement: 42003_2022_4128_MOESM2_ESM.pdf [file 42003_2022_4128_MOESM2_ESM.pdf]

## **Description of Additional Supplementary File**

**File name:** Supplementary Data 1.

**Description:** CSF and brain volume and ICP changes of patients from before shunting to 15 months after shunting. CSF: cerebrospinal fluid; ICP: Intracranial pressure.
